# Supplementary material
Source: PubMed Central journal article supplement (PMC6928443)
Supplement: NIHMS1046304-supplement-Supplement.pdf [file NIHMS1046304-supplement-Supplement.pdf]

**Table S1 – Ascertainment of Nontransplant Hepatocellular Carcinoma Therapies**

|                                | <b>Step 1</b>                                                                                                                                                                                                                                                                                                                                                                                                                                                                                                                                                                                                                                                                                                                | <b>Step 2</b>                                                                                                                                                                                                                                                                                                                                                                                                                                            |
|--------------------------------|------------------------------------------------------------------------------------------------------------------------------------------------------------------------------------------------------------------------------------------------------------------------------------------------------------------------------------------------------------------------------------------------------------------------------------------------------------------------------------------------------------------------------------------------------------------------------------------------------------------------------------------------------------------------------------------------------------------------------|----------------------------------------------------------------------------------------------------------------------------------------------------------------------------------------------------------------------------------------------------------------------------------------------------------------------------------------------------------------------------------------------------------------------------------------------------------|
| <b>Therapy</b>                 | <b>SQL Query (VHA database)</b>                                                                                                                                                                                                                                                                                                                                                                                                                                                                                                                                                                                                                                                                                              | <b>Manual Processing (STATA)</b>                                                                                                                                                                                                                                                                                                                                                                                                                         |
| Resection/ Partial Hepatectomy | <ul style="list-style-type: none"> <li>• WHERE CPT code EQUALS: 47120, 47122, 47125, or 47130. Cross-validated with expression search for “HEPATECTOMY”</li> <li>• Did NOT include 47100 (biopsy of liver, wedge) or 47135 (orthotopic liver transplantation)</li> </ul>                                                                                                                                                                                                                                                                                                                                                                                                                                                     | Detailed manual expression searches to validate results                                                                                                                                                                                                                                                                                                                                                                                                  |
| Ablation                       | <ul style="list-style-type: none"> <li>• WHERE CPT code EQUALS: 47370, 47371, 47380, 47381, 47382, 47383, 76940, 77013, C1886, C1888, C2618, S2210, 97020, or 97024</li> </ul> <p>To identify all outpatient events, we performed the following SQL queries on the raw data table <i>Radiology_radx_examinations_70_03</i>:</p> <ul style="list-style-type: none"> <li>• WHERE (Procedure2X LIKE '%ablat%' OR Procedure2X LIKE '%abalat%') AND EXamstatusX NOT LIKE 'CANC%' AND ExamDate IS NOT NULL</li> <li>• WHERE Procedure2X LIKE '%ethan%' AND EXamstatusX NOT LIKE 'CANC%' AND ExamDate IS NOT NULL</li> <li>• WHERE Procedure2X LIKE '%microw%' AND EXamstatusX NOT LIKE 'CANC%' AND ExamDate IS NOT NULL</li> </ul> | Detailed manual searches to exclude results with the following expressions: <i>renal, bone, lung, kidney, thyroid, afib, whole body, cardiac, A-V node, saphenous vein, extremity vein, electrophys, incompetent vein, 1<sup>st</sup> vein, laser vein ablation, lymphocele, pulmonary, fibroadenoma, inferior turbinate, tongue base, polyp, rectal tumor, prostate, septal ablation, hysteroscopy, reconstruction of atria, transoral, colonoscopy</i> |
